# Supplementary material for: Trauma system funding: implications for the surgeon health policy advocate
Source: PubMed Central journal article supplement — Trauma Surg Acute Care Open. 2020 Nov 30;5(1):e000615. doi: 10.1136/tsaco-2020-000615 (PMC7705494; doi:10.1136/tsaco-2020-000615), 2020-11-30
Supplement: tsaco-2020-000615supp001.pdf [file tsaco-2020-000615supp001.pdf]

| Question                                                                                                                                | Answer                                                                                                                                                                                                                                                                                                             | Citation                                                                                                                                                    | Summary |
|-----------------------------------------------------------------------------------------------------------------------------------------|--------------------------------------------------------------------------------------------------------------------------------------------------------------------------------------------------------------------------------------------------------------------------------------------------------------------|-------------------------------------------------------------------------------------------------------------------------------------------------------------|---------|
| Alabama<br><b>Does the state have any statutes addressing trauma funding?</b>                                                           | Yes.<br><br>The Statewide Trauma Fund has been created by §22-11D-9, Code of Ala. 1975. Funding allocations received from the Alabama State Legislature, and from gifts or other payments that may be received by the Department for the Fund, are to be distributed according to a methodology established by the | <a href="http://www.alabamaadministrativecode.state.al.us/docs/hlth/420-2-2.pdf">http://www.alabamaadministrativecode.state.al.us/docs/hlth/420-2-2.pdf</a> |         |
| <b>Does the state have any regulations or administrative rules addressing trauma funding? If so what is the agency of jurisdiction?</b> | Yes.<br><br>Alabama State Department of Health Services.                                                                                                                                                                                                                                                           |                                                                                                                                                             |         |

**How much money is appropriated for trauma funding? What sources of revenue are used to fund the trauma system?**

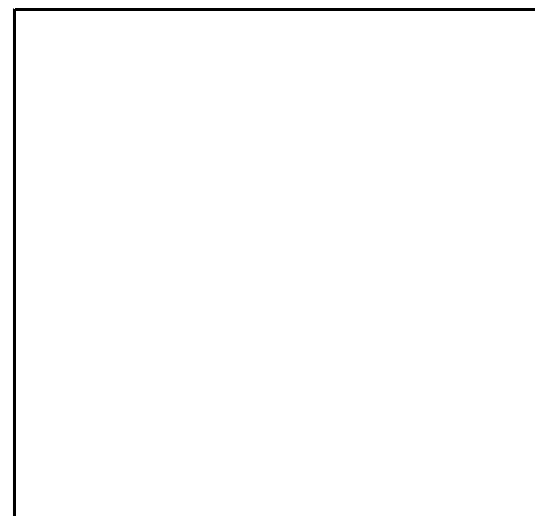

**Are there any pending bills or proposed administrative rules?**

| Question                                                                     | Answer | Citation                                                                                                                                    | Summary |
|------------------------------------------------------------------------------|--------|---------------------------------------------------------------------------------------------------------------------------------------------|---------|
| Alaska<br><b>Does the state have any statutes addressing trauma funding?</b> | Yes.   | <a href="http://dhss.alaska.gov/dph/Emergency/Pages/trauma/default.aspx">http://dhss.alaska.gov/dph/Emergency/Pages/trauma/default.aspx</a> |         |

**Does the state have any regulations or administrative rules addressing trauma funding? If so what is the agency of jurisdiction?**

**How much money is appropriated for trauma funding? What sources of revenue are used to fund the trauma system?**

Current funding sources: Community Health Grants to support Community Health Aide Training and medical supervision; Rural Health Flexibility Funding provides trauma training to Critical Access Hospitals and emergency services; capital project funding via state for communications equipment; HRSA's Emergency medical Services for Children program funding pays portion of the salary support for the individual filling part-time trauma manager position; NIOSH funds 1 FTE and 2 contractors for trauma registry; Federal Emergency Preparedness Grants to develop and implement fire and burn injury prevention strategies; Code Blue Project Funds to provide EMS equipment and ambulances for local communities; \$14 million in 2008 provided for new EMS equipment with assistance of USDA, Rasmusson Foundation and Denali Commission; if state charges fees for designation

**Are there any pending bills or proposed administrative rules?**

**Question**  
Arizona

**Answer**

**Citation**

**Summary**

**Does the state have any statutes addressing trauma funding?**

Yes

A.R.S. § 36-770 - Tobacco products tax fund  
 A.R.S. § 36-776 - Emergency health services account  
 A.R.S. § 36-2201 – Definitions  
 A.R.S. § 36-2202 - Duties of the director; qualifications of medical director  
 A.R.S. § 36-2203 - Emergency medical services council; membership  
 A.R.S. § 36-2208 - Bureau of emergency medical services and trauma system  
 A.R.S. § 36-2209 - Powers and duties of the director  
 A.R.S. § 36-2218 - Emergency medical services operating fund  
 A.R.S. § 36-2219.01. Medical services enhancement fund  
 A.R.S. § 36-2221 - Trauma center data; requirements; confidentiality; violation; classification  
 A.R.S. § 36-2222 - Trauma advisory board; membership; compensation; duties  
 A.R.S. § 36-2225 - Statewide emergency medical services and trauma system; definitions  
 A.R.S. § 36-2903.07 - Trauma and emergency services fund

The Arizona Department of Health Services (ADHS) maintains authority over the development of emergency medical services (EMS) and trauma systems. Several state statutes identify ADHS as the lead agency for trauma systems (and EMS). The trauma system is administered through the Bureau of EMS and Trauma Systems (BEMSTS), which falls under the jurisdiction of the ADHS. Sources of trauma funding include the Medical Services Enhancement Fund, the Trauma and Emergency Services Fund, and the Tobacco Tax and Healthcare fund. Some funding comes out of the Arizona EMS Operating Fund, and additional funding is also available from the Trauma and Emergency Services Fund which is administered by Arizona Health Care Cost Containment System (AHCCCS). Finally, the AHCCCS helps support Level I trauma centers and emergency department costs by helping to defray trauma readiness and uncompensated care costs.

A.R.S. § 36-770 (Tobacco Products Tax Fund)  
 Twenty cents of each dollar in the fund shall be deposited in the emergency health services account established by section 36-776

A.R.S. § 36-776 (Emergency Health Services Account)  
 The emergency health services account is established consisting of monies deposited pursuant to section 36-770. The Arizona health care cost containment system administration shall administer the account. The administration shall use account monies solely for the

**Does the state have any regulations or administrative rules addressing trauma funding? If so what is the agency of jurisdiction?** Yes

#### **AHCCCS Rules**

R9-22-2101

R9-22-2101

R9-22-2101

#### **ADHS Rules**

R9-25-1301 - Definitions

R9-25-1303 - Application and Designation Process

R9-25-1303.01 - Health Care

Institutions with Provisional Designation

R9-25-1304 - Changes Affecting Designation Status

R9-25-1305 - Modification of Designation

R9-25-1306 - Inspections

R9-25-1307 - Designation and Dedenomination

R9-25-1308 - Trauma Center Responsibilities

R9-22-2101 (Administration of Trauma and Emergency Services Fund)

The Administration shall distribute 90% of monies from the trauma and emergency services fund to a level I trauma center [] for unrecovered trauma center readiness costs... Unexpended funds may be used to reimburse unrecovered emergency room costs... The Administration shall distribute 10% of monies from the trauma and emergency services fund, for unrecovered emergency services costs, to a hospital having an emergency department, using criteria under R9-22-2103. Reimbursement is limited to no more than the amount of unrecovered emergency services costs... The Administration may distribute more than 10% of the monies for unrecovered emergency room costs when there are unexpended monies

R9-22-2103 (Distributions from Trauma and Emergency Services Fund)

[T]he Administration shall distribute monies available in the trauma and emergency services fund... as allocated under R9-22-2101(C)... [o]n a pro rata share of each hospital's cost of uncompensated emergency care as a percentage of the total statewide cost of uncompensated emergency care provided by hospitals... as reported... to the Arizona Department of Health Services under A.R.S. § 36-125.04.

R9-22-2102 (Distribution of Trauma and Emergency Services Fund: Level I Trauma Centers) [The Administration shall distribute monies, under R9-22-2101(B) to level I trauma centers using monies

**How much money is appropriated for trauma funding? What sources of revenue are used to fund the trauma system?**

**AZ S.B.1520** (Appropriations Bill 2018-2019)  
<https://apps.azleg.gov/BILLSTATUS/GETDOCUMENTPDF/462646>

Department of Health Services Operating Budget FY 2018-2019

\$138,572,50

Tobacco Products Tax Fund, Emergency Health Services Account Budget FY 2018-2019  
 \$17,966,100

Emergency Medical services Operating Fund FY 2018-2019  
 -----

**Are there any pending bills or proposed administrative rules?** No

**Question**

**Answer**

**Citation**

**Summary**

Arkansas

**Does the state have any statutes addressing trauma funding?** Yes.

Act 559 of 1993, (“The Trauma System Act”) and Act 393 of 2009, (An Act to Amend the Trauma System Act) codified at Ark. Code Ann. § 20-13-801 et seq.  
<http://www.arkleg.state.ar.us/assembly/2009/R/Acts/Act393.pdf>

In addition to modernizing and funding the state Truma System, and conferring regulatory authority to the ADH, Act 393 also established the Trauma Advisory Council, which “provides guidance and advice to the ADH regarding Trauma System implementation; and, conduct[s] other liaison activities with a wide variety of individuals and groups having an interest in the [] Trauma System.”

Ark. Stat. Ann. §20-13-806 (establishing trauma registry).  
<http://law.justia.com/codes/arkansas/2010/title-20/subtitle-2/chapter-13/subchapter-8/20-13-806/>

|                                                                                                                                         |                                                         |                                                                                                                                                                                                                                                                                                                                                                             |                                                                                                                                                                                                                                                                                                                                                               |
|-----------------------------------------------------------------------------------------------------------------------------------------|---------------------------------------------------------|-----------------------------------------------------------------------------------------------------------------------------------------------------------------------------------------------------------------------------------------------------------------------------------------------------------------------------------------------------------------------------|---------------------------------------------------------------------------------------------------------------------------------------------------------------------------------------------------------------------------------------------------------------------------------------------------------------------------------------------------------------|
| <b>Does the state have any regulations or administrative rules addressing trauma funding? If so what is the agency of jurisdiction?</b> | Yes.                                                    | Rule 007.28.08-002 - Arkansas Trauma systems rules and regulations.<br><a href="http://www.healthy.arkansas.gov/aboutADH/RulesRegs/TraumaSystems.pdf">http://www.healthy.arkansas.gov/aboutADH/RulesRegs/TraumaSystems.pdf</a>                                                                                                                                              | Administrative authority over the state run trauma system is statutorily conferred to the Arkansas Department of Health. The ADH has promulgated its own rules regarding oversight and operation of the Trauma System.                                                                                                                                        |
| <b>How much money is appropriated for trauma funding? What sources of revenue are used to fund the trauma system?</b>                   | \$25,899,450.00 (USD) - pending confirmation from staff | AR HB 1168 benchmarks an appropriation of \$25,899,450 for the Arkansas Trauma System.                                                                                                                                                                                                                                                                                      |                                                                                                                                                                                                                                                                                                                                                               |
| <b>Are there any pending bills or proposed administrative rules?</b>                                                                    | Yes.                                                    | AR HB 1168 (Act 854 of 2017)<br><a href="http://www.arkleg.state.ar.us/assembly/2017/2017R/Bills/HB1168.pdf">http://www.arkleg.state.ar.us/assembly/2017/2017R/Bills/HB1168.pdf</a><br><br>AR SB 612 (Act 812 of 2017)<br><a href="http://www.arkleg.state.ar.us/assembly/2017/2017R/Bills/SB612.pdf">http://www.arkleg.state.ar.us/assembly/2017/2017R/Bills/SB612.pdf</a> | HB 1168 is the appropriations omnibus bill for the Fiscal year 2017-2018.<br>Status: Signed into Law April 3, 2017.<br><br>SB 612 amends membership and duties requirements for the Trauma Advisory Council. Allows the ADH to temporarily waive the education requirements for participation in the trauma system.<br>Status: Signed into Law April 4, 2017. |

**Question**  
California

**Answer**

**Citation**

**Summary**

**Does the state have any statutes addressing trauma funding?** Yes.

a. establish the trauma system;

i. IC 16-19-3-28

b. confer regulatory jurisdiction to the State Department of Health (or other similar agency) and;

i. IC 16-19-3-28

c. which code sections establish the funding mechanism for the trauma system.

i. IC 16-41-42.2-4

**Does the state have any regulations or administrative rules addressing trauma funding? If so what is the agency of jurisdiction?**



**How much money is appropriated for trauma funding? What sources of revenue are used to fund the trauma system?**

Traffic fines, property tax, state general fund for FY 2002-2003 was \$25M. Level I-II \$150,000 minimum Department of Health Level III \$50,000 minimum Any facility with costs exceeding the minimum payment may then be awarded additional funds if available to cover outstanding costs, plus 1 percent of the total payment for administrative costs.

Maddy Emergency Medical Services Fund (Maddy Fund) to compensate health care providers (hospitals and physicians) for emergency services for the uninsured and medically indigent and to ensure the population has continued access to emergency care. Maddy Funds are financed through additional penalties assessed on certain criminal and motor vehicles fines and forfeitures (\$2 per \$10 fine). Although this funding does not specifically provide for trauma care, it can be used for uncompensated emergency care reimbursements.

**Are there any pending bills or proposed administrative rules?**

**Question**

**Answer**

**Citation**

**Summary**

Colorado

**Does the state have any statutes addressing trauma funding?**

**Does the state have any regulations or administrative rules addressing trauma funding? If so what is the agency of jurisdiction?**

**How much money is appropriated for trauma funding? What sources of revenue are used to fund the trauma system?**

Colorado imposes a \$1 surcharge on motor vehicle registrations to support emergency medical and trauma services statewide. In FY 2004-05, about \$4.6 million was collected. The money is distributed by the Colorado Department of Public Health and Environment as grants to local emergency medical and trauma service providers.

**Are there any pending bills or proposed administrative rules?**

**Question**

**Answer**

**Citation**

**Summary**

Connecticut

**Does the state have any statutes addressing trauma funding?** Yes.

<https://eregulations.ct.gov/eRegsPortal/Browse/getDocument?guid=%7B60A1E155-0100-C365-9FB5-A08880A7112C%7D>

**Does the state have any regulations or administrative rules addressing trauma funding? If so what is the agency of jurisdiction?**

The Trauma Care Fund, which is distributed to LEMSAs, who are required to distribute 99% to trauma centers in its region with 1% allotment for administration. 2005/6 legislature appropriated \$10 million to trauma centers.

**How much money is appropriated for trauma funding? What sources of revenue are used to fund the trauma system?**

**Are there any pending bills or proposed administrative rules?**

**Question**

**Answer**

**Citation**

**Summary**

Delaware

**Does the state have any statutes addressing trauma funding?** Yes.

<http://dhss.delaware.gov/dph/em/s/trauma.html>

**Does the state have any regulations or administrative rules addressing trauma funding? If so what is the agency of jurisdiction?**

**How much money is appropriated for trauma funding? What sources of revenue are used to fund the trauma system?**

**Are there any pending bills or proposed administrative rules?**

**Question**

Florida

**Answer**

**Citation**

**Summary / Notes**

**Does the state have any statutes addressing trauma funding?** Yes.

F.S. 395.401 and F.S. 395.4015 (organic statute establishing the trauma system)  
<http://www.flsenate.gov/Laws/Statutes/2017/395.401>  
<http://www.flsenate.gov/Laws/Statutes/2017/395.4015>

F.S. 395.4015 requires the Florida Department of Health to “establish a state trauma system plan... [with] trauma regions that cover all geographical areas of the state and have boundaries that are coterminous with the boundaries of the regional domestic security task forces... [which] may serve as the basis for the development of department-approved local or regional trauma plans... The department shall use the state trauma system plan as the basis for establishing a statewide inclusive trauma system.”

F.S. 395.4036 (establishes the funding and payment methodology)  
<http://www.flsenate.gov/Laws/Statutes/2017/395.4036>

F.S. 318.18(d)(3)(h) (details collections procedures for funds)  
<http://www.flsenate.gov/Laws/Statutes/2017/318.18>

F.S. 395.404(1) (establishes the state trauma registry)  
<http://www.flsenate.gov/Laws/Statutes/2017/395.404>

**Does the state have any regulations or administrative rules addressing trauma funding? If so what is the agency of jurisdiction?**

Yes. Florida Department of Health  
 Administrative Rule: 64J-2.019

Rule: 64J-2.019  
<https://www.flrules.org/gateway/ruleno.asp?id=64J-2.019>

Florida confers regulatory jurisdiction to the Department of Health which oversees the State Trauma System. The state trauma system is funded through assessments taken against traffic penalties.

The disbursement methodology for funds collected is covered by F.S. 318.14 and F.S. 318.18.

|                                                                                                                       |                     |                      |                                                                                                                                                                                                                                                                                                                                                                                                                                                                                                                                                                                                     |
|-----------------------------------------------------------------------------------------------------------------------|---------------------|----------------------|-----------------------------------------------------------------------------------------------------------------------------------------------------------------------------------------------------------------------------------------------------------------------------------------------------------------------------------------------------------------------------------------------------------------------------------------------------------------------------------------------------------------------------------------------------------------------------------------------------|
| <b>How much money is appropriated for trauma funding? What sources of revenue are used to fund the trauma system?</b> | Pending from Staff. | F.S. 318.18(d)(3)(h) | F.S. 318.18(d)(3)(h) details collections procedures from traffic violations such that “[a] person cited for a second or subsequent conviction of speed exceeding the limit by 30 miles per hour and above within a 12-month period shall pay a fine that is [\$500]... Moneys received from the increased fine imposed by this paragraph shall be remitted to the Department of Revenue and deposited into the Department of Health Emergency Medical Services Trust Fund to provide financial support to certified trauma centers... Fifty percent [of monies received] shall be allocated equally |
|-----------------------------------------------------------------------------------------------------------------------|---------------------|----------------------|-----------------------------------------------------------------------------------------------------------------------------------------------------------------------------------------------------------------------------------------------------------------------------------------------------------------------------------------------------------------------------------------------------------------------------------------------------------------------------------------------------------------------------------------------------------------------------------------------------|

|                                                                      |             |                                                                                                                                                                                                                                                                                                                                                                                             |                                                                                                                                                                                                                                                                                                                                                                                                                           |
|----------------------------------------------------------------------|-------------|---------------------------------------------------------------------------------------------------------------------------------------------------------------------------------------------------------------------------------------------------------------------------------------------------------------------------------------------------------------------------------------------|---------------------------------------------------------------------------------------------------------------------------------------------------------------------------------------------------------------------------------------------------------------------------------------------------------------------------------------------------------------------------------------------------------------------------|
| <b>Are there any pending bills or proposed administrative rules?</b> | Yes. Bills. | <p>FL HB 1077<br/> <a href="http://www.myfloridahouse.gov/Sections/Bills/billsdetail.aspx?BillId=58901&amp;SessionId=83">http://www.myfloridahouse.gov/Sections/Bills/billsdetail.aspx?BillId=58901&amp;SessionId=83</a></p> <p>FL S 746<br/> <a href="http://flsenate.gov/Session/Bill/2017/746/BillText/Filed/HTML">http://flsenate.gov/Session/Bill/2017/746/BillText/Filed/HTML</a></p> | <p>FL 1077 (2017) Determines need for minimum number of Level I or Level II adult trauma centers in trauma service areas with certain population levels; authorizes DOH to establish additional trauma centers. Status: Died in Health and Human Services Committee 5/5/2017</p> <p>FL 746 (2017) amends F.S. s. 395.40 through 395.50, as well as other sections, to update legislative intent and clarify language.</p> |
|----------------------------------------------------------------------|-------------|---------------------------------------------------------------------------------------------------------------------------------------------------------------------------------------------------------------------------------------------------------------------------------------------------------------------------------------------------------------------------------------------|---------------------------------------------------------------------------------------------------------------------------------------------------------------------------------------------------------------------------------------------------------------------------------------------------------------------------------------------------------------------------------------------------------------------------|

**Question**  
Georgia

**Answer**

**Citation**

**Summary**

**Does the state have any statutes addressing trauma funding?** Yes.

O.C.G.A. § 31-11-101  
(establishes the Georgia Trauma Care Network Commission)  
<https://www.lexisnexis.com/hottopics/gacode/>

O.C.G.A. § 31-11-101 (2017) Establishes the Georgia Trauma Care Network Commission which is a nine member Board which five members are appointed by the Governor, two member appointed by the Lt. Governor, and two members are appointed by the Speaker of the House of Representatives.

O.C.G.A. § 31-11-102  
(establishes the duties of the Trauma Care Network Commission)  
<https://www.lexisnexis.com/hottopics/gacode/>

Per O.C.G.A. § 31-11-102 (2017) The Board shall apply for and “distribute [trauma] funds... with priority for distribution to be set by majority vote of the commission. The Board must also “develop, implement, administer, and maintain a system to compensate designated trauma centers for a portion of their cost of readiness [and also apply distribute funds that trauma centers are eligible to apply for] through a semiannual distribution from the Georgia Trauma Trust Fund...” The Board is also responsible for compensating physicians who provide uncompensated call and trauma care services and to “reserve and disburse additional moneys to increase the number of participants in the Georgia trauma system.”

O.C.G.A. § 31-11-103  
(establishes the Georgia Trauma Trust Fund)  
<https://www.lexisnexis.com/hottopics/gacode/>

O.C.G.A. § 31-11-103 establishes the Georgia Trauma Trust Fund)  
Which is overseen by the Georgia Trauma Care Network Commission.

O.C.G.A. § 40-6-189  
(establishes the funding mechanism for the Georgia Trauma Trust Fund)  
<http://www.lexisnexis.com/hottopics/gacode/Default.asp>

|                                                                                                                                         |                                                                                                                                                                    |                                                                                                                                                                                                                                                                                           |                                                                                                                                                                                                                                                                                                                                                                                                                                                                                                                                                                                                  |
|-----------------------------------------------------------------------------------------------------------------------------------------|--------------------------------------------------------------------------------------------------------------------------------------------------------------------|-------------------------------------------------------------------------------------------------------------------------------------------------------------------------------------------------------------------------------------------------------------------------------------------|--------------------------------------------------------------------------------------------------------------------------------------------------------------------------------------------------------------------------------------------------------------------------------------------------------------------------------------------------------------------------------------------------------------------------------------------------------------------------------------------------------------------------------------------------------------------------------------------------|
| <b>Does the state have any regulations or administrative rules addressing trauma funding? If so what is the agency of jurisdiction?</b> | Yes.                                                                                                                                                               | Ga. Comp. R. & Regs. Section 511-9-2-.04 (Designation of Specialty Care Centers)<br><a href="http://rules.sos.state.ga.us/gac/511-9-2-.04">http://rules.sos.state.ga.us/gac/511-9-2-.04</a>                                                                                               | Section 511-9-2-.04 requires the Georgia Department of Public Health to “define the process for trauma center designation and re-designation [as well as] review, enforce, and recommend removal of trauma center designation for trauma centers failing to comply with applicable statutes, Rules and Regulations, and department policy.” Additionally “[e]ach designated trauma center shall submit data to the state trauma registry in a manner and frequency as prescribed by the [D]epartment.” Designation as a trauma center lasts three years before re-certification must take place. |
|                                                                                                                                         |                                                                                                                                                                    | Ga. Comp. R. & Regs. Section 511-9-2-.02 (Definitions)<br><a href="http://rules.sos.state.ga.us/gac/511-9-2-.02">http://rules.sos.state.ga.us/gac/511-9-2-.02</a>                                                                                                                         | Ga. Comp. R. & Regs. Section 511-9-2-.02 determines that a “Specialty Care Center” is a “licensed hospital dedicated to a specific sub-specialty care including, but not limited to, trauma, stroke, pediatric, burn and .. ..”                                                                                                                                                                                                                                                                                                                                                                  |
| <b>How much money is appropriated for trauma funding? What sources of revenue are used to fund the trauma system?</b>                   | <b>Sub Totals for FY 2016.</b><br>Total from Trauma Fund \$10,961,703<br>Trauma Registry Payment \$1,000,000<br><br><b>Grand Total for FY 2016</b><br>\$11,961,703 | See statutes section above.<br><a href="http://georgiatraumacommission.org/wp-content/uploads/2016/08/FY_2017_GTC_Budget_19_May_2016_Amended_Approved.pdf">http://georgiatraumacommission.org/wp-content/uploads/2016/08/FY_2017_GTC_Budget_19_May_2016_Amended_Approved.pdf</a>          | O.C.G.A. § 40-6-189 requires that the Department “administer and collect a fee of \$200.00 from any driver who is convicted of driving at a speed of 85 miles per hour or more on any road or highway or 75 miles per hour or more on any two-lane road or highway... All fees collected under the provisions of this Code section shall be deposited in the general fund [] with the intent that these moneys be used to fund a trauma care system in Georgia... The Office of the                                                                                                              |
| <b>Are there any pending bills or proposed administrative rules?</b>                                                                    | Yes.                                                                                                                                                               | GA HR 160 and GA SA 145<br><a href="http://www.legis.ga.gov/Legislation/20172018/164180.pdf">http://www.legis.ga.gov/Legislation/20172018/164180.pdf</a><br><a href="http://www.legis.ga.gov/Legislation/20172018/164231.pdf">http://www.legis.ga.gov/Legislation/20172018/164231.pdf</a> | GA HR 160 and GA SA 145 were passed with help from the Georgia Trauma Commission (GTC), the Georgia Trauma Foundation 2 (GTF), the Georgia Society of the American College of Surgeons (GSACS). The bills officially recognize February 7, 2017 as Trauma Awareness Day at the Capitol.                                                                                                                                                                                                                                                                                                          |
| <b>Question</b><br>Hawaii                                                                                                               | <b>Answer</b>                                                                                                                                                      | <b>Citation</b>                                                                                                                                                                                                                                                                           | <b>Summary</b>                                                                                                                                                                                                                                                                                                                                                                                                                                                                                                                                                                                   |

**Does the state have any statutes addressing trauma funding?** Yes.

<https://law.justia.com/codes/hawaii/2015/title-19/chapter-321/section-321-22.5/>

**§321-22.5 Trauma system special fund.** (a) There is established within the state treasury a special fund to be known as the trauma system special fund to be administered and expended by the department of health. The fund shall consist of: (1) Surcharges collected pursuant to sections 291-15, 291C-2, and 291E-7; (2) Cigarette tax revenues designated under section 245-15; (3) Federal funds granted by Congress or executive order for the purpose of this chapter; provided that the acceptance and use of federal funds shall not commit state funds for services and shall not place an obligation upon the legislature to continue the purpose for which the federal funds are made available; (4) Funds appropriated by the legislature for this purpose, including grants-in-aid; (5) Grants, donations, and contributions from private or public

**Does the state have any regulations or administrative rules addressing trauma funding? If so what is the agency of jurisdiction?** Yes



**How much money is appropriated for trauma funding? What sources of revenue are used to fund the trauma system?**

<http://health.hawaii.gov/oppd/files/2015/06/Trauma-Special-Fund-Sec-321-22.5g.pdf>

In FY 2014, revenue collected from 1.50 cents per cigarette sold pursuant to section 245-15, HRS, was deposited into the trauma system special fund. The trauma system special fund revenues from cigarette sales (source code 0012) in FY 2014 were \$10,540,112.12 1 . In Act 231, SLH 2008, moneys earmarked from surcharges that range between \$10 and \$500 for a variety of traffic violations shall be deposited to the trauma system special fund, effective July 1, 2008. The trauma system special fund revenues from traffic fines (source code 1550) in FY 2014 were \$84,528.99 1 . The trauma system special fund revenues from the investment pool

**Are there any pending bills or proposed administrative rules?**

**Question**

**Answer**

**Citation**

**Summary**

Idaho

**Does the state have any statutes addressing trauma funding?**

**Does the state have any regulations or administrative rules addressing trauma funding? If so what is the agency of jurisdiction?**

**How much money is appropriated for trauma funding? What sources of revenue are used to fund the trauma system?**

**Are there any pending bills or proposed administrative rules?**

| Question                                                                                                                                | Answer                               | Citation                                                                                                                                                        | Summary                                                                                                                                                                                                                                                                                                                                                                                                                                                    |
|-----------------------------------------------------------------------------------------------------------------------------------------|--------------------------------------|-----------------------------------------------------------------------------------------------------------------------------------------------------------------|------------------------------------------------------------------------------------------------------------------------------------------------------------------------------------------------------------------------------------------------------------------------------------------------------------------------------------------------------------------------------------------------------------------------------------------------------------|
| Illinois<br><b>Does the state have any statutes addressing trauma funding?</b>                                                          | Yes                                  | <a href="http://www.ilga.gov/commission/jcar/admincode/077/077005150/H20900R.html">http://www.ilga.gov/commission/jcar/admincode/077/077005150/H20900R.html</a> | <b>The Department shall distribute 97.5% of 50% of the moneys deposited into the Trauma Center Fund, a special fund in the State Treasury, to Illinois hospitals that are currently designated as trauma centers. (Section 3.225(a) of the Act) The distribution to individual hospitals shall be based on the number of trauma cases, including cases where the hospital provides initial trauma care only, and the average length of stay for trauma</b> |
| <b>Does the state have any regulations or administrative rules addressing trauma funding? If so what is the agency of jurisdiction?</b> | Yes<br>Illinois Department of Health | <a href="http://www.ilga.gov/commission/jcar/admincode/077/077005150/H20900R.html">http://www.ilga.gov/commission/jcar/admincode/077/077005150/H20900R.html</a> | TITLE 77: PUBLIC HEALTH<br>CHAPTER I: DEPARTMENT OF PUBLIC HEALTH<br>SUBCHAPTER f: EMERGENCY SERVICES AND HIGHWAY SAFETY<br>PART 515 EMERGENCY MEDICAL SERVICES, TRAUMA CENTER, COMPREHENSIVE STROKE CENTER, PRIMARY STROKE CENTER AND ACUTE STROKE READY HOSPITAL CODE<br>SECTION 515.2090 TRAUMA CENTER FUND                                                                                                                                             |
| <b>How much money is appropriated for trauma funding? What sources of revenue are used to fund the trauma system?</b>                   |                                      |                                                                                                                                                                 | Yes. The money collected is deposited in the Illinois Trauma Center Fund & the Dept. of Public Aid I distributes 97.5% of 50% of the moneys deposited to hospitals that are currently designated as trauma centers.                                                                                                                                                                                                                                        |

**Are there any pending bills or proposed administrative rules?**

| Question                                                                                                                                | Answer                                                                                                                                            | Citation                                                                                                                                            | Summary                                                                                                                                                                                                                                                                                                                                                                                                                 |
|-----------------------------------------------------------------------------------------------------------------------------------------|---------------------------------------------------------------------------------------------------------------------------------------------------|-----------------------------------------------------------------------------------------------------------------------------------------------------|-------------------------------------------------------------------------------------------------------------------------------------------------------------------------------------------------------------------------------------------------------------------------------------------------------------------------------------------------------------------------------------------------------------------------|
| Indiana<br><b>Does the state have any statutes addressing trauma funding?</b>                                                           | Yes                                                                                                                                               |                                                                                                                                                     | <ul style="list-style-type: none"> <li>a. establish the trauma system;               <ul style="list-style-type: none"> <li>i. IC 16-19-3-28</li> </ul> </li> <li>b. confer regulatory jurisdiction to the State Department of Health (or other similar agency) and;               <ul style="list-style-type: none"> <li>i. IC 16-19-3-28</li> </ul> </li> <li>c. which code sections establish the funding</li> </ul> |
| <b>Does the state have any regulations or administrative rules addressing trauma funding? If so what is the agency of jurisdiction?</b> | Yes                                                                                                                                               | <a href="http://www.in.gov/legislative/iac/20131120-IR-410120617FRA.xml.pdf">http://www.in.gov/legislative/iac/20131120-IR-410120617FRA.xml.pdf</a> | Trauma Registry Rule: 410 IAC 34                                                                                                                                                                                                                                                                                                                                                                                        |
| <b>How much money is appropriated for trauma funding? What sources of revenue are used to fund the trauma system?</b>                   | The division can use up to 50% of Indiana Spinal Cord and Brain Injury Research fund, IC 16-41-42.2-4, which is appropriated ~\$1.4 million/year. |                                                                                                                                                     |                                                                                                                                                                                                                                                                                                                                                                                                                         |
| <b>Are there any pending bills or proposed administrative rules?</b>                                                                    | None                                                                                                                                              |                                                                                                                                                     |                                                                                                                                                                                                                                                                                                                                                                                                                         |

| Question | Answer | Citation | Summary |
|----------|--------|----------|---------|
| Iowa     |        |          |         |

**Does the state have any statutes  
addressing trauma funding?** Yes.

**Does the state have any  
regualtions or adminstritive  
rules addressing trauma  
funding? If so what is the  
agency of jurisdiction?**

**How much money is  
appropriated for trauma  
funding? What sources of  
revenue are used to fund the  
truma system?**

**Are there any pending bills or  
proposed administrative rules?**

| Question                                                                         | Answer | Citation | Summary |
|----------------------------------------------------------------------------------|--------|----------|---------|
| Kansas<br><b>Does the state have any statutes<br/>addressing trauma funding?</b> | Yes.   |          |         |

**Does the state have any  
regualtions or adminstritive  
rules addressing trauma  
funding? If so what is the  
agency of jurisdiction?**

**How much money is appropriated for trauma funding? What sources of revenue are used to fund the trauma system?**

**Are there any pending bills or proposed administrative rules?**

| <b>Question</b>                                                                                                                         | <b>Answer</b>                  | <b>Citation</b> | <b>Summary</b>                                                                                                                                                                                                                                                                                                                                                                   |
|-----------------------------------------------------------------------------------------------------------------------------------------|--------------------------------|-----------------|----------------------------------------------------------------------------------------------------------------------------------------------------------------------------------------------------------------------------------------------------------------------------------------------------------------------------------------------------------------------------------|
| Kentucky<br><b>Does the state have any statutes addressing trauma funding?</b>                                                          | Yes.                           |                 |                                                                                                                                                                                                                                                                                                                                                                                  |
| <b>Does the state have any regulations or administrative rules addressing trauma funding? If so what is the agency of jurisdiction?</b> | Yes<br>Kentucky Dept of Health |                 | While the trauma system enabling legislation includes a provision addressing the use of funds, the system itself has no reliable funding source. Funding for the trauma registry has been available for the past six years through the Kentucky Transportation Cabinet's Office of Highway Safety, using federal awards from the National Highway Traffic Safety Administration. |

**How much money is appropriated for trauma funding? What sources of revenue are used to fund the trauma system?**

The statewide trauma care program shall consist of, at a minimum, a statewide trauma care director and a state trauma registrar funded through available federal funds or, to the extent that funds are available, by the trauma care system fund established in KRS 211.496

KY filed legislation in 2006 session to establish an Office of Trauma Care in the KY Department of Public Health and an advisory committee. It would be voluntary verification by the hospital and get accredited by the American College of Surgeons. The legislation also sought to raise funding by assessing auto insurance, sale of guns & other funding requirements. Because of controversy with the funding, we ended up asking for \$20 million in state appropriations to fund the trauma system which because of the size of the request, did not get funded. We hope to discuss this issue in the interim legislative session.

**Are there any pending bills or proposed administrative rules?**

**Question**

Louisiana

**Does the state have any statutes addressing trauma funding?**

**Answer**

No rules impacting funding. The trauma system is administered via the Louisiana Emergency Response Network (see attached enabling legislation). Rules have been promulgated.

**Citation**

**Summary**

**How much money is appropriated for trauma funding? What sources of revenue are used to fund the trauma system?**

2.5 million in 2017

2010 = \$2.8 million, 2011 = \$ 2.37 million, 2012 = \$2.5 million, 2013 = \$2.4 million, 2014 = \$ 2.4 million, 2015 = \$2.7 million, 2016=\$2.3 million

We do not have a dedicated funding source. To date the legislature appropriates funds from the state general fund.

No rules impacting funding. The trauma system is administered via the Louisiana Emergency Response Network (see attached enabling legislation). Rules have been promulgated.

**Are there any pending bills or proposed administrative rules?**

None

**Question**

**Answer**

**Citation**

**Summary**

Maine

**Does the state have any statutes addressing trauma funding?**

Yes.

**Does the state have any regulations or administrative rules addressing trauma funding? If so what is the agency of jurisdiction?**

**How much money is appropriated for trauma funding? What sources of revenue are used to fund the trauma system?**

**Are there any pending bills or proposed administrative rules?**

**Question**

**Answer**

**Citation**

**Summary**

Maryland

**Does the state have any statutes addressing trauma funding?**

**Does the state have any regulations or administrative rules addressing trauma funding? If so what is the agency of jurisdiction?**

**How much money is appropriated for trauma funding? What sources of revenue are used to fund the trauma system?**

**Are there any pending bills or proposed administrative rules?**

**Question**

**Answer**

**Citation**

**Summary**

Massachusetts



|                                                                                                                                         |                                                                                                                                                                                                                                                             |                                                                                                                                                                                                                   |                                                                                                                                                                                                                                                |
|-----------------------------------------------------------------------------------------------------------------------------------------|-------------------------------------------------------------------------------------------------------------------------------------------------------------------------------------------------------------------------------------------------------------|-------------------------------------------------------------------------------------------------------------------------------------------------------------------------------------------------------------------|------------------------------------------------------------------------------------------------------------------------------------------------------------------------------------------------------------------------------------------------|
| <b>Does the state have any statutes addressing trauma funding?</b>                                                                      | Yes.                                                                                                                                                                                                                                                        | Mass Gen. Laws Ann. ch. 111C §3(8)<br><a href="https://malegislature.gov/Laws/GeneralLaws/PartI/TitleXVI/Chapter111C/Section3">https://malegislature.gov/Laws/GeneralLaws/PartI/TitleXVI/Chapter111C/Section3</a> | Mass Gen. Laws Ann. ch. 111C §3(8) directs the Massachusetts Department of Health and Human Services to “develop statewide coordinated trauma care systems, and establish minimum standards for and designate trauma centers.                  |
| <b>Does the state have any regulations or administrative rules addressing trauma funding? If so what is the agency of jurisdiction?</b> | Yes.                                                                                                                                                                                                                                                        | 105 CMR 170.050<br><a href="http://www.mass.gov/eohhs/docs/dph/regs/105cmr170.pdf">http://www.mass.gov/eohhs/docs/dph/regs/105cmr170.pdf</a>                                                                      | 105 CMR 170.050 requires the Department to develop a statewide EMS plan which must include “[a]ccessible hospitals, including trauma centers and other health care facilities.” The state EMS plan must be updated at least every three years. |
| <b>How much money is appropriated for trauma funding in 2017? What sources of revenue are used to fund the trauma system?</b>           | Public health emergency preparedness response - \$13,458,412 (federal).<br>EMS for children - \$130,000 (federal)<br>Regional EMS - \$831,959<br>Matching funds for federal Emergency Preparedness Grant - \$1,522,254<br>- pending confirmation from staff |                                                                                                                                                                                                                   |                                                                                                                                                                                                                                                |
| <b>Are there any pending bills or proposed administrative rules?</b>                                                                    | No.                                                                                                                                                                                                                                                         |                                                                                                                                                                                                                   |                                                                                                                                                                                                                                                |

| Question | Answer | Citation | Summary |
|----------|--------|----------|---------|
| Michigan |        |          |         |

**Does the state have any statutes addressing trauma funding?**

**Does the state have any regulations or administrative rules addressing trauma funding? If so what is the agency of jurisdiction?**

**How much money is appropriated for trauma funding? What sources of revenue are used to fund the trauma system?**

**Are there any pending bills or proposed administrative rules?**

| <b>Question</b>                                                                 | <b>Answer</b> | <b>Citation</b>                                                                                                               | <b>Summary</b> |
|---------------------------------------------------------------------------------|---------------|-------------------------------------------------------------------------------------------------------------------------------|----------------|
| Minnesota<br><b>Does the state have any statutes addressing trauma funding?</b> | Yes           | <a href="http://www.health.state.mn.us/traumasystem/statute.html">http://www.health.state.mn.us/traumasystem/statute.html</a> |                |

|                                                                                                                                         |                                                                                                                                                                                                                                                                                                                                                                                                                                                       |                                                                                                                                                                                                                                                                                                    |
|-----------------------------------------------------------------------------------------------------------------------------------------|-------------------------------------------------------------------------------------------------------------------------------------------------------------------------------------------------------------------------------------------------------------------------------------------------------------------------------------------------------------------------------------------------------------------------------------------------------|----------------------------------------------------------------------------------------------------------------------------------------------------------------------------------------------------------------------------------------------------------------------------------------------------|
| <b>Does the state have any regulations or administrative rules addressing trauma funding? If so what is the agency of jurisdiction?</b> | The Minnesota Statutes 144.602 – 144.608 establishes and governs the trauma system. We do not have administrative rules. The system is exempt from the requirement to write rules; and instead the health commissioner is empowered to adopt trauma system criteria. At the moment, the commissioner (through the State Trauma Advisory Council) is considering modifying the criteria for Level 4 trauma hospitals. You can find that proposal here: | <a href="http://www.health.state.mn.us/traumasystem/currentissues/level4_proposal.html">http://www.health.state.mn.us/traumasystem/currentissues/level4_proposal.html</a>                                                                                                                          |
| <b>How much money is appropriated for trauma funding? What sources of revenue are used to fund the trauma system?</b>                   | Annual appropriation of \$352,000/year. Since there has been a moratorium on hospital beds for some time, that amount has been stable throughout the entire 12-year history of the trauma system. And that's it. We don't have any additional dedicated funding sources.                                                                                                                                                                              | Funded through a general fund appropriation. They are "special" funds that are sourced from a portion of each hospital's licensing fee and earmarked for the state's trauma system. Each hospital, whether designated as a trauma hospital or not, pays a base fee + so much for each licensed bed |
| <b>Are there any pending bills or proposed administrative rules?</b>                                                                    | No                                                                                                                                                                                                                                                                                                                                                                                                                                                    |                                                                                                                                                                                                                                                                                                    |

| Question                                                                                                                                | Answer                                | Citation                                                                                                                                              | Summary                                                                                                                                                                                                                                                                                                                                                                                                                 |
|-----------------------------------------------------------------------------------------------------------------------------------------|---------------------------------------|-------------------------------------------------------------------------------------------------------------------------------------------------------|-------------------------------------------------------------------------------------------------------------------------------------------------------------------------------------------------------------------------------------------------------------------------------------------------------------------------------------------------------------------------------------------------------------------------|
| Mississippi<br><b>Does the state have any statutes addressing trauma funding?</b>                                                       | Yes                                   | <a href="https://msdh.ms.gov/msdhsite/index.cfm/49,5671,313,639.pdf/5671.pdf">https://msdh.ms.gov/msdhsite/index.cfm/49,5671,313,639.pdf/5671.pdf</a> | The Mississippi State Legislature passed HB 966 in 1998. The bill established the Trauma Care Trust Fund (TCTF). Initially, funded with \$ 6,000,000 from the tobacco expendable fund and an assessment placed on fines collected from moving violations, the TCTF has historically funded statewide system administration and development, regional administration and                                                 |
| <b>Does the state have any regulations or administrative rules addressing trauma funding? If so what is the agency of jurisdiction?</b> | Yes. Mississippi Department of Health |                                                                                                                                                       | The Legislature passed House Bill 1511 in the 2017 Regular Session. This bill restored up to \$7,023,197 of fees collected from moving violations to the Trauma system, but it reduced the amount the Legislature authorized the Mississippi State Department of Health to spend on Trauma FY 2018 Mississippi Trauma System of Care Plan Page   16 Approved 12 July 2017 from \$ 40,000,000 to \$ 20,000,000. Based on |
| <b>How much money is appropriated for trauma funding? What sources of revenue are used to fund the trauma system?</b>                   |                                       |                                                                                                                                                       |                                                                                                                                                                                                                                                                                                                                                                                                                         |
| <b>Are there any pending bills or proposed administrative rules?</b>                                                                    |                                       |                                                                                                                                                       |                                                                                                                                                                                                                                                                                                                                                                                                                         |

| Question | Answer | Citation | Summary |
|----------|--------|----------|---------|
| Missouri |        |          |         |

**Does the state have any statutes addressing trauma funding?** Yes

Statutes relating to TCD are found in Chapter 190.001 to 190.537, RSMo. establish the trauma system; 190.241, RSMo Confer regulatory jurisdiction to the State Department of Health (or other similar agency) and; 190.241, RSMo, Currently, TCD is funded

**Does the state have any regulations or administrative rules addressing trauma funding? If so what is the agency of jurisdiction?** Yes

Regulations for the trauma portion of the TCD program are as follows:  
19 CSR 30-40.410  
19 CSR 30-40.420  
19 CSR 30-40.430  
19 CSR 30-40.440

Senate Bill 50 from the 2017 legislative session allows trauma centers who are currently designated through the ACS to apply for an “alternate pathway” designation (example the State will acknowledge a Level I ACS Trauma Center as a Level I Missouri Trauma center without state review as long as they remain

**How much money is appropriated for trauma funding? What sources of revenue are used to fund the trauma system?**

The Trauma Center designation is a component of the Department’s Time Critical Diagnosis (TCD) program. The amount allocated for this program is \$203,120.53.

**Are there any pending bills or proposed administrative rules?** None

**Question**  
Montana

**Answer**

**Citation**

**Summary**

**Does the state have any statutes addressing trauma funding?**

**Does the state have any regulations or administrative rules addressing trauma funding? If so what is the agency of jurisdiction?**

**How much money is appropriated for trauma funding? What sources of revenue are used to fund the trauma system?**

**Are there any pending bills or proposed administrative rules?**

**Question**

**Answer**

**Citation**

**Summary**

Nebraska

**Does the state have any statutes addressing trauma funding?**

**Does the state have any regulations or administrative rules addressing trauma funding? If so what is the agency of jurisdiction?**

**How much money is appropriated for trauma funding? What sources of revenue are used to fund the trauma system?**

Emergency Operations fund that generates funding from "Fifty-Cents for Life" LB 191, an additional fifty-cents fee on the motor vehicle registration. This fund generates appx. \$1.2 million/year dollars to support the following programs: EMS, Trauma, Emergency Medical Services for Children and part of the Emergency Medical Services Act that supports licensing and training for EMT's and paramedics

**Are there any pending bills or proposed administrative rules?**

**Question**

**Answer**

**Citation**

**Summary**

Nevada

**Does the state have any statutes addressing trauma funding?** Yes

**NRS 450B.236** Approval required for operation of center for treatment of trauma.

**NRS 450B.237** Establishment of program for treatment of trauma; regulations; proposal to designate hospital as a trauma center; approval by Administrator of Division; standards; compliance.

**Does the state have any regulations or administrative rules addressing trauma funding? If so what is the agency of jurisdiction?**

**How much money is appropriated for trauma funding? What sources of revenue are used to fund the trauma system?**

**Are there any pending bills or proposed administrative rules?**

| Question                                                                            | Answer | Citation                                                                                                                                                    | Summary          |
|-------------------------------------------------------------------------------------|--------|-------------------------------------------------------------------------------------------------------------------------------------------------------------|------------------|
| New Hampshire<br><b>Does the state have any statutes addressing trauma funding?</b> | No     | <a href="https://www.nh.gov/safety/divisions/fstems/ems/documents/acsreport.pdf">https://www.nh.gov/safety/divisions/fstems/ems/documents/acsreport.pdf</a> | None established |

**Does the state have any regulations or administrative rules addressing trauma funding? If so what is the agency of jurisdiction?**

**How much money is appropriated for trauma funding? What sources of revenue are used to fund the trauma system?**

**Are there any pending bills or proposed administrative rules?**

| Question                                                                         | Answer | Citation                                                                                                              | Summary |
|----------------------------------------------------------------------------------|--------|-----------------------------------------------------------------------------------------------------------------------|---------|
| New Jersey<br><b>Does the state have any statutes addressing trauma funding?</b> | Yes    | <a href="ftp://www.njleg.state.nj.us/2012/2013/PL13/223_.PDF">ftp://www.njleg.state.nj.us/2012/2013/PL13/223_.PDF</a> |         |



**Does the state have any regulations or administrative rules addressing trauma funding? If so what is the agency of jurisdiction?**

**How much money is appropriated for trauma funding? What sources of revenue are used to fund the trauma system?**

**Are there any pending bills or proposed administrative rules?**

**Question**

New Mexico

**Answer****Citation****Summary**

**Does the state have any statutes addressing trauma funding?** Yes.

NMSA §§ 24-10E-2 through 24-10E-7  
<https://law.justia.com/codes/new-mexico/2017/chapter-24/article-10e/>

**§ 24-10E-2**  
The purpose of the Trauma System Fund Authority Act is to provide funding to sustain existing trauma centers, support the development of new trauma centers and develop a statewide trauma system.

**§24-10E-5**

The authority shall:

- A. develop criteria by which distribution of funds to existing trauma centers and potential new centers will occur;
- B. receive applications and determine and monitor the actual distribution of money from the fund that will support the development of a statewide system of trauma care;
- C. oversee the department's administration of the fund and the development of a trauma system; and
- D. report annually to the interim legislative health and human services committee and the legislative finance committee.

**§24-10E-6**

The "trauma system fund" is created in the state treasury. The fund shall consist of money appropriated and transferred to the fund, money received by the authority from any public or private source and tax revenues distributed to the fund by law. Interest earned on investment of the fund shall be credited to the fund. Disbursements from the fund shall be made upon warrants drawn by the secretary of finance and administration pursuant to vouchers signed by the secretary of health or the secretary's authorized

|                                                                                                                                         |                                                                                                                                                                          |                                                                                                                                                                                                                                                                                                                                                                   |                                                                                                                                                                                                                                                                                                                                                                                                                                                                                                                                                                                                                                                                                                                                                                                                                                                                                                                                                                                                                                                                                                                                                                                                                                                                                                                                                               |
|-----------------------------------------------------------------------------------------------------------------------------------------|--------------------------------------------------------------------------------------------------------------------------------------------------------------------------|-------------------------------------------------------------------------------------------------------------------------------------------------------------------------------------------------------------------------------------------------------------------------------------------------------------------------------------------------------------------|---------------------------------------------------------------------------------------------------------------------------------------------------------------------------------------------------------------------------------------------------------------------------------------------------------------------------------------------------------------------------------------------------------------------------------------------------------------------------------------------------------------------------------------------------------------------------------------------------------------------------------------------------------------------------------------------------------------------------------------------------------------------------------------------------------------------------------------------------------------------------------------------------------------------------------------------------------------------------------------------------------------------------------------------------------------------------------------------------------------------------------------------------------------------------------------------------------------------------------------------------------------------------------------------------------------------------------------------------------------|
| <b>Does the state have any regulations or administrative rules addressing trauma funding? If so what is the agency of jurisdiction?</b> | <p>Yes.</p> <p>§ 24-10E-7</p> <p>The [New Mexico][D]epartment [of Health] shall promulgate rules to carry out the provisions of the Trauma System Fund Authority Act</p> | <p>NMAC §§ 7.27.7.1 through 7.27.7.14</p> <p><a href="http://164.64.110.239/nmac/parts/title07/07.027.0007.htm">http://164.64.110.239/nmac/parts/title07/07.027.0007.htm</a></p> <p>NMAC §§ 7.27.9.1 through 7.27.9.12</p> <p><a href="http://164.64.110.239/nmac/parts/title07/07.027.0009.htm">http://164.64.110.239/nmac/parts/title07/07.027.0009.htm</a></p> | <p>Pursuant to NMAC § 7.27.9.2 “The Trauma System Fund Authority [“The Authority”] shall [be responsible for managing and responding to] requests made for funds available pursuant to the Trauma System Fund Authority Act, Sections 24-10E-1, et seq, NMSA 1978.</p> <p>As required by NMAC § 7.27.9.11 the Authority approve annual funding for each existing trauma center, in conjunction with an approved application, such that “an allocation will be made to each trauma center based on their level of designation subject to the availability of funds... [L]evel I, II, and III trauma centers will receive their share of the remaining dollars in the existing trauma center funding program, based upon their relative share of uncompensated trauma care for these centers as determined by the authority... The [D]epartment [of Health] shall prepare a written agreement with each existing trauma center awarded funding under this rule that reflects the term and amount of the award, and the expectations and conditions for receiving the award, including fiscal accountability and reporting requirements... Funds awarded under the existing trauma center funding program must be used to support, sustain, or enhance the trauma program including support for trauma-related clinical and administrative personnel on-call</p> |
| <b>How much money is appropriated for trauma funding? What sources of revenue are used to fund the trauma system?</b>                   | <p>\$1,635,400 (FY 2018)</p> <p>\$1,955,147 (FY 2017)</p> <p>\$2,774,159 (FY 2016)</p> <p>\$3,738,630 (FY 2015)</p> <p>\$3,946,200 (FY 2014)</p>                         |                                                                                                                                                                                                                                                                                                                                                                   |                                                                                                                                                                                                                                                                                                                                                                                                                                                                                                                                                                                                                                                                                                                                                                                                                                                                                                                                                                                                                                                                                                                                                                                                                                                                                                                                                               |

**Are there any pending bills or proposed administrative rules?** No

**Question**

New York

**Does the state have any statutes addressing trauma funding?** Yes.

**Answer**

**Citation**

**Summary**

Article 30b of the State of New York Public Health Law (under the Emergency Medical Services section) governs the trauma system  
<https://www.health.ny.gov/professionals/ems/art30.htm#BM3011>

Section 3061 of the New York Public Health Law is establishes the statewide system of trauma care which includes “coordination of such care between prehospital and in hospital personnel and collaborating public health, safety, and welfare officials, the quality management and review of such care, and the development and maintenance of a statewide system for inter-facility transfer, including but not limited to aeromedical transport, of critically ill or injured patients between general hospitals and other health care facilities, are essential public health services. It is the purpose of this article to promote the public health, safety and welfare by providing for development and maintenance of systems for emergency medical, trauma, and disaster care.”

Section 3064 of the New York Public Health Law establishes the State Trauma Advisory Committee (TAC). The TAC is empaneled to “advise the [Department and the [Health] [C]ommissioner regarding trauma and disaster care within the state, and assist the [D]epartment and the [C]ommissioner in the coordination of trauma and disaster care, including but not limited to, the development, periodic revision, and application of statewide appropriateness review standards, quality improvement guidelines for trauma and disaster care, trauma systems, trauma centers and trauma stations...”

Section 3064 of the New York Public Health Law establishes Regional Trauma Advisory Committees which “advise the [TAC], the [D]epartment and the

|                                                                                                                                         |                                                                                                                                                                                                                                                                                             |                                                                                                                                                                                                                                                |                                                                                                                                                                                                                                                                                                                                                                                                                                                                                                                                                                                                                                                                                                                                                                                         |
|-----------------------------------------------------------------------------------------------------------------------------------------|---------------------------------------------------------------------------------------------------------------------------------------------------------------------------------------------------------------------------------------------------------------------------------------------|------------------------------------------------------------------------------------------------------------------------------------------------------------------------------------------------------------------------------------------------|-----------------------------------------------------------------------------------------------------------------------------------------------------------------------------------------------------------------------------------------------------------------------------------------------------------------------------------------------------------------------------------------------------------------------------------------------------------------------------------------------------------------------------------------------------------------------------------------------------------------------------------------------------------------------------------------------------------------------------------------------------------------------------------------|
| <b>Does the state have any regulations or administrative rules addressing trauma funding? If so what is the agency of jurisdiction?</b> | Yes (see citations section).<br><br>Note that Section 2803(2) of the Public Health Law, and Section 708.2(b) of Article 2 of Subchapter C of Chapter V of Title 10 (Health) of the Official Compilation of Codes confer regulatory jurisdiction to the New York State Department of Health. | 10 NYCRR Section 708.2<br>10 NYCRR Section 708.5<br>10 NYCRR Part 405                                                                                                                                                                          | Definitions.<br><a href="https://www.health.ny.gov/professionals/ems/state_trauma/docs/traumastds7082.pdf">https://www.health.ny.gov/professionals/ems/state_trauma/docs/traumastds7082.pdf</a><br><br>10 NYCRR Section 708.5 establishes the Trauma Center Standards and procedures for Departmental review.<br><a href="https://www.health.ny.gov/professionals/ems/state_trauma/docs/traumastds7085.pdf">https://www.health.ny.gov/professionals/ems/state_trauma/docs/traumastds7085.pdf</a><br><br>10 NYCRR Part 405 establishes the Pediatric Minimum Standards for trauma care.<br><a href="https://www.health.ny.gov/professionals/patients/patient_rights/parents_rights/2014-04-">https://www.health.ny.gov/professionals/patients/patient_rights/parents_rights/2014-04-</a> |
| <b>How much money is appropriated for trauma funding? What sources of revenue are used to fund the trauma system?</b>                   | None.                                                                                                                                                                                                                                                                                       | N/A                                                                                                                                                                                                                                            | Staff reported that, other than part-time staff to help manage the State Trauma Advisory Committee, the state does not provide trauma specific funding. More information is pending regarding federal trauma funding in the state.                                                                                                                                                                                                                                                                                                                                                                                                                                                                                                                                                      |
| <b>Are there any pending bills or proposed administrative rules?</b>                                                                    | Yes.                                                                                                                                                                                                                                                                                        | N/A                                                                                                                                                                                                                                            | According to staff, the Department of Health is planning promulgating rule amendments that will delete Part 708 (Trauma) from the “Appropriateness Review” process, and create a new Part 405 (Trauma) under the state’s hospital regulations. The proposed rules are scheduled to be published in the New York State Register this fall. Note that an amendment                                                                                                                                                                                                                                                                                                                                                                                                                        |
| <b>Question</b><br>North Carolina<br><b>Does the state have any statutes addressing trauma funding?</b>                                 | <b>Answer</b><br>Yes                                                                                                                                                                                                                                                                        | <b>Citation</b><br><a href="https://www.ncems.org/pdf/Trauma/History%20of%20the%20North%20Carolina%20Trauma%20System%20Aug05-1.pdf">https://www.ncems.org/pdf/Trauma/History%20of%20the%20North%20Carolina%20Trauma%20System%20Aug05-1.pdf</a> | <b>Summary</b>                                                                                                                                                                                                                                                                                                                                                                                                                                                                                                                                                                                                                                                                                                                                                                          |

**Does the state have any regulations or administrative rules addressing trauma funding? If so what is the agency of jurisdiction?**

**How much money is appropriated for trauma funding? What sources of revenue are used to fund the trauma system?**

**Are there any pending bills or proposed administrative rules?**

**Question**

North Dakota

**Does the state have any statutes addressing trauma funding?**

**Answer**

**Citation**

**Summary**

**Does the state have any regulations or administrative rules addressing trauma funding? If so what is the agency of jurisdiction?**

**How much money is appropriated for trauma funding? What sources of revenue are used to fund the trauma system?**

**Are there any pending bills or proposed administrative rules?**

| Question                                                           | Answer | Citation                                                                                                                | Summary                                                                                                                                                  |
|--------------------------------------------------------------------|--------|-------------------------------------------------------------------------------------------------------------------------|----------------------------------------------------------------------------------------------------------------------------------------------------------|
| Ohio                                                               |        |                                                                                                                         |                                                                                                                                                          |
| <b>Does the state have any statutes addressing trauma funding?</b> | Yes.   | Ohio Rev. Code Ann. §4765.06<br><a href="http://codes.ohio.gov/orc/4765">http://codes.ohio.gov/orc/4765</a>             | §4513.263(E) Establishes funding sources for the trauma and emergency medical services fund.                                                             |
|                                                                    |        | Ohio Rev. Code Ann. §4765.01<br><a href="http://codes.ohio.gov/orc/4765">http://codes.ohio.gov/orc/4765</a>             | §4513.263 Occupant Restraining Devices (Funding)                                                                                                         |
|                                                                    |        | Ohio Rev. Code Ann. §4513.263(E)<br><a href="http://codes.ohio.gov/orc/4513">http://codes.ohio.gov/orc/4513</a>         | §4765.01 Division of Emergency Medical Services (Definitions); Identifies trauma centers as those “verified by the American College of Surgeons.”        |
|                                                                    |        | Ohio Rev. Code Ann. §4765 (all sections)<br><a href="http://codes.ohio.gov/orc/4765">http://codes.ohio.gov/orc/4765</a> | §4765.04 Firefighter and Fire Safety Inspector Training Committee – Trauma Committee – Other Committees and Subcommittees (Establishes Trauma Committee) |
|                                                                    |        |                                                                                                                         | §4765.06 Emergency Medical Services Incidence Reporting System – State Trauma Registry (Establishes Trauma Registry)                                     |
|                                                                    |        |                                                                                                                         | §4765.07 Administrative Rules for the Grant Program (Trauma Research Grants)                                                                             |
|                                                                    |        |                                                                                                                         | §4765.12 Guidelines for Care of Trauma Victims by Emergency Medical Service Personnel (Trauma Care Guidelines)                                           |
|                                                                    |        |                                                                                                                         | §4765.40 Written Protocols for Triage of Adult and                                                                                                       |

**Does the state have any regulations or administrative rules addressing trauma funding? If so what is the agency of jurisdiction?**

Yes.

OAC §4765-4  
<http://codes.ohio.gov/oac/4765-14>

§4765-4 Reporting Delivery of Emergency Medical Services and Trauma Care (Reporting rules).

§4765-14 Trauma Triage (Trauma Triage rules).

OAC §4765-4  
<http://codes.ohio.gov/oac/4765-4-01v1>

Note that all administrative codes (rules) in Ohio require periodic review. Two rules (OAC §4765-4 and §4765-14) related to trauma were reviewed over the past several months; no significant changes are recommended.

**How much money is appropriated for trauma funding? What sources of revenue are used to fund the trauma system?**

Total Wages/Benefits for Division of EMS staff assigned to perform activities associated with trauma = approximately \$575,000 (Total wages and benefits; personnel not exclusively assigned to trauma)

Ohio Rev. Code Ann.  
§4513.263(E)

§4513.263(E) requires that that the trauma and emergency medical services fund be satisfied with monies from (1) “[a]pplication fees for certificates of accreditation, certificates of approval, certificates to teach, and certificates to practice”; funds from fees and fines assessed as part of the fire service training program; fees and fines assessed for operation of emergency medical, fire, transportation, and ambulance services; as well as “[f]orty-five per cent of the fines collected from or moneys arising from bail forfeited by persons apprehended or arrested by state highway patrol troopers...”

Grant funds appropriated for trauma research (e.g., research the causes, nature, and effects of traumatic injuries, educate the public about injury prevention, and implement, test, and evaluate injury prevention strategies) = \$281,563

Expenses associated with Trauma Committee meetings = \$3371

The Division of EMS is responsible for the certification of all emergency medical service and fire service providers in the state of Ohio; certification of fire and EMS instructors; accreditation and chartering of fire and EMS training institutions; approval of EMS continuing education sites; collection and analysis of EMS incident data; coordination of the EMS for Children (EMSC) program; and regulation of medical transportation services (air medical, ambulance, MoICU, and ambulance). In addition, the Division serves as the “lead agency” for the state’s trauma system.

The Division of EMS staff assigned to trauma “wear several hats” For example, the Deputy Director for the



**Are there any pending bills or proposed administrative rules?** Yes.

OH HB 261  
[file:///C:/Users/christianjohnson/Downloads/hb261\\_02\\_RCH.pdf](file:///C:/Users/christianjohnson/Downloads/hb261_02_RCH.pdf)

A trauma bill (Sub. H.B. 261) was introduced in the 131st General Assembly (2015-2016) on June 17, 2015. The bill did not make it out of committee. The bill has not been reintroduced.

**Question**  
Oklahoma

**Answer**

**Citation**

**Summary**

**Does the state have any statutes addressing trauma funding?** Yes

[https://www.ok.gov/health/Protective\\_Health/Emergency\\_Systems/Trauma\\_Division/index.html](https://www.ok.gov/health/Protective_Health/Emergency_Systems/Trauma_Division/index.html)

The Oklahoma Trauma System Improvement and Development Act (SB 1554 by Robinson & Hilliard) was passed during the 2004 legislative session

**Does the state have any regulations or administrative rules addressing trauma funding? If so what is the agency of jurisdiction?**

[https://www.ok.gov/health/Protective\\_Health/Emergency\\_Systems/Trauma\\_Care\\_Assistance\\_Revolving\\_Fund/index.html](https://www.ok.gov/health/Protective_Health/Emergency_Systems/Trauma_Care_Assistance_Revolving_Fund/index.html)

Senate Bill 290 established the Trauma Care Assistance Revolving Fund (Trauma Fund) in 1999. This Bill provided for reimbursement of uncompensated costs associated with trauma care provided by recognized trauma facilities and emergency medical providers. In 2004, House Bill 1554 added physicians to the list of

**How much money is appropriated for trauma funding? What sources of revenue are used to fund the trauma system?**

Trauma Care Assistance Revolving Fund. A portion of the tobacco tax increase, \$1 per year on every drivers licenses & fines & fees on moving violations. From Apr. '01-'08, \$72M (90%) allocated for uncompensated trauma care and \$8M (10%) to Department of Health-Trauma Division for operating funds. Since inception, Fund has reimburses providers 43% of uncompensated costs for Tx of trauma patients with ISS 9+, leaving approx \$96M of unfunded trauma care.

Hospitals receive enhanced Medicaid reimbursement at Medicare rates for trauma patients. Level I-III also receive incremental Medicaid outpatient reimbursement on all Medicaid outpatients who present to hospital Eds. LI-II also

**Are there any pending bills or proposed administrative rules?**

| Question                                                                                                                                | Answer | Citation                                  | Summary                                                                                                                                                                       |
|-----------------------------------------------------------------------------------------------------------------------------------------|--------|-------------------------------------------|-------------------------------------------------------------------------------------------------------------------------------------------------------------------------------|
| Oregon<br><b>Does the state have any statutes addressing trauma funding?</b>                                                            | Yes    |                                           |                                                                                                                                                                               |
| <b>Does the state have any regulations or administrative rules addressing trauma funding? If so what is the agency of jurisdiction?</b> | Yes    | <b>ORS 431A, OAR 333-200, OAR 333-205</b> | Funding provided through Department of Human Services as general fund appropriations, currently augmented by a HRSA Trauma/EMS grant. Funding is for system development only. |
| <b>How much money is appropriated for trauma funding? What sources of revenue are used to fund the trauma system?</b>                   |        | <b>ORS 431A, OAR 333-200, OAR 333-205</b> | From July 2015 through June 2017 = \$582,159 (\$984,871 includes the Trauma Data System & Data Team)                                                                          |
| <b>Are there any pending bills or proposed administrative rules?</b>                                                                    |        |                                           |                                                                                                                                                                               |
| Question                                                                                                                                | Answer | Citation                                  | Summary                                                                                                                                                                       |
| Pennsylvania                                                                                                                            |        |                                           |                                                                                                                                                                               |

**Does the state have any statutes addressing trauma funding?** Yes.

35 PA.C.S.  
75 PA.C.S.

(Act of Aug. 18, 2009, P.L. 308, No. 37) (SB 240 2009, and SB 922 of 2009)

[http://www.health.pa.gov/My%20Health/Emergency%20Medical%20Services/EMS%20Regulations/Documents/EMSAct\\_37\\_Chapter%2081.pdf](http://www.health.pa.gov/My%20Health/Emergency%20Medical%20Services/EMS%20Regulations/Documents/EMSAct_37_Chapter%2081.pdf)

35 PA.C.S. § 8107, and other related code sections, addresses the Emergency Medical Services Operating Fund and related distributions. They also establish the Pennsylvania Trauma Systems Foundation to oversee the Fund, and confer powers and duties on the Department of Health in administering the state trauma and EMS systems.

Funding is secured through annual appropriations. Note that monies are also collected from motorists who are cited for moving violations and are used to fund the EMS Operating Fund.

**Does the state have any regulations or administrative rules addressing trauma funding? If so what is the agency of jurisdiction?**

Yes.

The Pennsylvania Department of Health.

Need to add Health Dept. Rules Here

**How much money is appropriated for trauma funding? What sources of revenue are used to fund the trauma system?**

Trauma prevention (state appropriation) - \$460,000  
 Traumatic brain injury (federal appropriation) - \$270,000  
 Trauma recovery (federal appropriation) - \$205,000  
 Payments to trauma centers (state appropriation) - \$8,656,000  
 Payments to trauma centers (federal appropriation) - \$9,310,000

Omnibus Grand Total 18,901,000

2017 funding for trauma centers from Governors Budget \$17,966. (8.6 million from state and remaining federal match via disproportionate share program)

[http://www.aging.pa.gov/publications/DHHS-Budget/Documents/2017-18\\_DHHS\\_%20BudgetHearingBook.pdf](http://www.aging.pa.gov/publications/DHHS-Budget/Documents/2017-18_DHHS_%20BudgetHearingBook.pdf) (pdf p. 10)

**PA HB 218 (2017)**

Omnibus appropriations bill to provide from the General Fund for the expenses of the Executive and Judicial Departments, the State Government Support Agencies, the General Assembly of the Commonwealth, the public debt, and the public schools for the fiscal year July 1, 2017, to June 30, 2018.

**Status:** became law without Governor's signature, July 11, 2017.

<http://www.legis.state.pa.us/cfdocs/billInfo/billInfo.cfm?sYear=2017&sInd=0&body=H&type=B&bn=0218>

**Are there any pending bills or proposed administrative rules?**

None pending

According to staff, the Department is currently working on new administrative rules impacting the development of Level IV Trauma Centers, and also making changes to EMS language prohibiting Level I and Level II centers from being located within 25 miles of each other, as well as mandating making other volume requirements. Staff were unable to provide a more definite timeline for development of a draft rule.

**Question**

Rhode Island

**Answer**

**Citation**

**Summary**

**Does the state have any statutes addressing trauma funding?**

**Does the state have any regulations or administrative rules addressing trauma funding? If so what is the agency of jurisdiction?**

**How much money is appropriated for trauma funding? What sources of revenue are used to fund the trauma system?**

**Are there any pending bills or proposed administrative rules?**



**Question**

**Answer**

**Citation**

**Summary**

**Does the state have any statutes addressing trauma funding?**

**Does the state have any regulations or administrative rules addressing trauma funding? If so what is the agency of jurisdiction?**



**How much money is appropriated for trauma funding? What sources of revenue are used to fund the trauma system?**

In FY 2005-2006 annual appropriations bill, the trauma system received \$4M (recurring) from general funds (2/3 was eligible for federal matching dollars for a total of \$12M). A provision was adopted earmarking the money, "From the funds appropriated for this purpose, the dept is directed to establish a trauma fund. 60% of the fund shall be used to create a pool to be allocated to trauma hospitals based on reimbursement methodology to be determined by the dept. 40% of the fund shall be used to increase reimbursement for trauma specialists' professional services. The identification of trauma specialists and reimbursement methodology shall be determined by the dept. The dept shall apply federal matching funds subject to approval by the Centers for Medicare & Medicaid Services. This provision takes effect October 1, 2005." In FY2006-2007 annual appropriations bill the trauma system received \$6M (\$4M recurring) (\$2M non-recurring) from general funds. A provision was passed designated the funding: "...\$4M shall be utilized for increasing the reimbursement rates for trauma hospitals, for trauma specialists' professional fee, for increasing the capability of EMS trauma care providers from counties with a high rate of traumatic injury deaths to care for injury patients & for support of the trauma system, based on a methodology as determined by the department with guidance & input from the trauma council as established in Section 44-61-530 of the SC code of laws. The methodology to be developed will include a breakdown of disbursement of funds by percentage, with a proposed 77% disbursed to hospitals & trauma physician fees, 11% of the 21% must be disbursed to EMS providers for training EMTs. Advanced EMTs & paramedics by the 4

**Are there any pending bills or proposed administrative rules?**

**Question**

South Dakota

**Does the state have any statutes addressing trauma funding?**

**Answer**

**Citation**

**Summary**

**Does the state have any regulations or administrative rules addressing trauma funding? If so what is the agency of jurisdiction?**

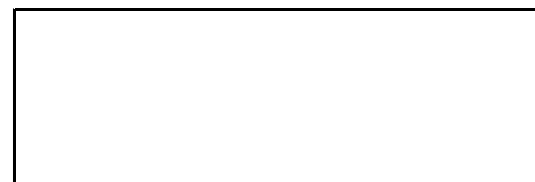

**How much money is appropriated for trauma funding? What sources of revenue are used to fund the trauma system?**

**Are there any pending bills or proposed administrative rules?**

**Question**

**Answer**

**Citation**

**Summary**

Tennessee

**Does the state have any statutes addressing trauma funding?** Yes

<https://law.justia.com/codes/tennessee/2010/title-68/chapter-59/>

**68-59-101-105**

**Does the state have any regulations or administrative rules addressing trauma funding? If so what is the agency of jurisdiction?**

<https://law.justia.com/codes/tennessee/2010/title-68/chapter-59/>

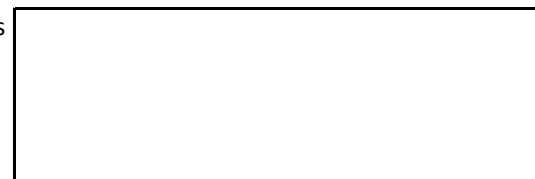

**How much money is appropriated for trauma funding? What sources of revenue are used to fund the trauma system?**

Though this amount will vary from year to year, at the end of 2015 this portion of the fund was approximately \$7,867,741.77.

**Are there any pending bills or proposed administrative rules?**

| <b>Question</b>                                                             | <b>Answer</b> | <b>Citation</b>                     | <b>Summary</b> |
|-----------------------------------------------------------------------------|---------------|-------------------------------------|----------------|
| Texas<br><b>Does the state have any statutes addressing trauma funding?</b> | Yes.          | See Section on Appropriations Below |                |



**Does the state have any regulations or administrative rules addressing trauma funding? If so what is the agency of jurisdiction?**

Yes.

**Trauma Designation Rules**

25 TAC §§133.181 through 133.190

25 TAC §157.2

25 TAC §§157.122 through 157.125

25 TAC §157.128

25 TAC §§157.130 through 157.133

<https://www.dshs.texas.gov/emstraumasystems/ruladopt.shtm#Designation>

The trauma designation rules address the following sections: (1) hospital level of care designations and requirements for neonatal and maternal care hospitals (levels I, II, III, and IV); (2) trauma service areas, and regional EMS trauma systems; (3) trauma facility designation and criteria (levels I, II, III, and IV); (4) denial, suspension, and revocation of trauma facility designation; (5) the emergency medical services and trauma care system account and emergency medical services—Section 157.130, (6) trauma facilities, and trauma care system fund; and (7) the regional trauma account.

**EMS Rules**

25 TAC §§157.1, through, 157.5

25 TAC §§157.11 through 157.16

25 TAC §157.25

25 TAC §§157.32 through 44

25 TAC §157.2549

<https://www.dshs.texas.gov/emstraumasystems/ruladopt.shtm#Designation>

The EMS rules address the following sections: (1) EMS, first responder, medical information officer, paramedic, and provider licenses, education, and certification, (2) audits and exemptions, (3) air ambulance licensure, (4) and the comprehensive clinical management program.

**Trauma/EMS Registries**

25 TAC §§ 103.4 through 103.8

<https://www.dshs.texas.gov/injury/rules.shtm>

Section 157.123 establishes the 22 state Regional Emergency Medical Services/Trauma Systems and their respective Regional Advisory Councils (RACs). Each RACs develops and implements a regional emergency medical service trauma system plan which is intended to improve and organize trauma care.

**How much money is appropriated for trauma funding? What sources of revenue are used to fund the trauma system?**

|                                                                                                                            |                                                                                                                                                                                                                                                                                                                                                                                                                                                                                                                                                                                                                                                                                                                                                               |                                                                                                                                                                                                                                                                                                                                                                                                                                                                                                                                                                                                                                                                                                                                                                                                                                                                                                                                                                                             |
|----------------------------------------------------------------------------------------------------------------------------|---------------------------------------------------------------------------------------------------------------------------------------------------------------------------------------------------------------------------------------------------------------------------------------------------------------------------------------------------------------------------------------------------------------------------------------------------------------------------------------------------------------------------------------------------------------------------------------------------------------------------------------------------------------------------------------------------------------------------------------------------------------|---------------------------------------------------------------------------------------------------------------------------------------------------------------------------------------------------------------------------------------------------------------------------------------------------------------------------------------------------------------------------------------------------------------------------------------------------------------------------------------------------------------------------------------------------------------------------------------------------------------------------------------------------------------------------------------------------------------------------------------------------------------------------------------------------------------------------------------------------------------------------------------------------------------------------------------------------------------------------------------------|
| <p>FY 2016-2017 1131 monies: \$612,120.37<br/> FY 2016-2017 911 monies: \$357,028.65<br/> FY 2016-2017 total monies: 0</p> | <p>THSC §780.001 through 780.003<br/> <a href="http://www.statutes.legis.state.tx.us/Docs/HS/htm/HS.780.htm#780.002">http://www.statutes.legis.state.tx.us/Docs/HS/htm/HS.780.htm#780.002</a><br/> <br/> THSC §780.004.<br/> <a href="http://www.statutes.legis.state.tx.us/Docs/HS/htm/HS.780.htm">http://www.statutes.legis.state.tx.us/Docs/HS/htm/HS.780.htm</a><br/> <br/> THSC §780.005<br/> <a href="http://www.statutes.legis.state.tx.us/Docs/HS/htm/HS.780.htm#780.005">http://www.statutes.legis.state.tx.us/Docs/HS/htm/HS.780.htm#780.005</a><br/> <br/> Texas Transportation Code §708<br/> <a href="http://www.statutes.legis.state.tx.us/Docs/TN/htm/TN.708.htm#708">http://www.statutes.legis.state.tx.us/Docs/TN/htm/TN.708.htm#708</a></p> | <p>Texas Health and Safety Code §780.004 directs the Texas Department of State Health Services (DSHS) to allocate and 27% of funds in the Trauma Care System Fund (1131 monies) and 27% of the funds in the Emergency Medical Services and Trauma Care Systems Account (911 monies) to help fund uncompensated trauma care.</p> <p>Texas Health and Safety Code §780.005 requires that the DSHS “with advice and counsel from the chairpersons of the trauma service area regional advisory councils, [] use money appropriated from the account... to fund designated trauma facilities, county and regional emergency medical services, and trauma care systems.”</p> <p>THSC §780.001 through 780.003 requires the Department of Public Safety to remit surcharges collected under the driver responsibility program (Texas Transportation Code §708) to the comptroller, who then must distribute 49.5 percent of the funds into the Trauma Facility and Emergency Medical Services</p> |
|----------------------------------------------------------------------------------------------------------------------------|---------------------------------------------------------------------------------------------------------------------------------------------------------------------------------------------------------------------------------------------------------------------------------------------------------------------------------------------------------------------------------------------------------------------------------------------------------------------------------------------------------------------------------------------------------------------------------------------------------------------------------------------------------------------------------------------------------------------------------------------------------------|---------------------------------------------------------------------------------------------------------------------------------------------------------------------------------------------------------------------------------------------------------------------------------------------------------------------------------------------------------------------------------------------------------------------------------------------------------------------------------------------------------------------------------------------------------------------------------------------------------------------------------------------------------------------------------------------------------------------------------------------------------------------------------------------------------------------------------------------------------------------------------------------------------------------------------------------------------------------------------------------|

**Are there any pending bills or proposed administrative rules?** Yes.

|                                                                                                                                                                                                         |                                                                                                                                                                                                                                                                                                                                                                                                                                                                             |
|---------------------------------------------------------------------------------------------------------------------------------------------------------------------------------------------------------|-----------------------------------------------------------------------------------------------------------------------------------------------------------------------------------------------------------------------------------------------------------------------------------------------------------------------------------------------------------------------------------------------------------------------------------------------------------------------------|
| <p>TX HB 328 (2017)<br/> <a href="http://www.legis.state.tx.us/tlodocs/851/billtext/pdf/HB00328I.pdf#navpanes=0">http://www.legis.state.tx.us/tlodocs/851/billtext/pdf/HB00328I.pdf#navpanes=0</a></p>  | <p><b>HB 328</b><br/>           Requires trauma service area regional advisory councils and the a special advisory council established by the law to collectively develop a written 25-year plan for coordinating emergency health care services throughout Texas</p>                                                                                                                                                                                                       |
| <p>TX HB 1148 (2017)<br/> <a href="http://www.legis.state.tx.us/tlodocs/85R/billtext/pdf/HB01148E.pdf#navpanes=0">http://www.legis.state.tx.us/tlodocs/85R/billtext/pdf/HB01148E.pdf#navpanes=0</a></p> | <p><b>Status:</b> died House Healthcare Committee .</p>                                                                                                                                                                                                                                                                                                                                                                                                                     |
| <p>TX HB 1407 (2017)<br/> <a href="http://www.legis.state.tx.us/tlodocs/85R/billtext/pdf/HB01407F.pdf#navpanes=0">http://www.legis.state.tx.us/tlodocs/85R/billtext/pdf/HB01407F.pdf#navpanes=0</a></p> | <p><b>HB 1148</b><br/>           “Requires development of a 25-year plan for the coordination of emergency healthcare services; allows RACs to apply to the Department of State Health Services to receive an administrative cooperatives designation; and once designated, makes a cooperative responsible for various administrative functions, including grants, contract management, and human resources.”</p>                                                          |
| <p>TX HB 4257 (2017)<br/> <a href="http://www.legis.state.tx.us/tlodocs/85R/billtext/pdf/HB04257I.pdf#navpanes=0">http://www.legis.state.tx.us/tlodocs/85R/billtext/pdf/HB04257I.pdf#navpanes=0</a></p> | <p><b>Status:</b> Died in Senate Healthcare Committee.</p>                                                                                                                                                                                                                                                                                                                                                                                                                  |
|                                                                                                                                                                                                         | <p><b>HB 1407</b><br/>           Amends the Health and Safety Code to “require the Department of State Health Services to establish the emergency medical services assistance program to provide financial and educational assistance to eligible emergency medical services providers. The bill provides for the distribution of grants under the program and sets out other program requirements.”<br/> <b>Status:</b> Signed into law 6/15/2017. Effective 9/1/2017.</p> |
|                                                                                                                                                                                                         | <p><b>HB 4257</b><br/>           Reduces amounts deposited into the general revenue</p>                                                                                                                                                                                                                                                                                                                                                                                     |

**Question**  
Utah

**Answer**

**Citation**

**Summary**

**Does the state have any statutes addressing trauma funding?** Yes.

Utah Code Ann. §§ 26-8a-251 through 26-8a-254  
[https://le.utah.gov/xcode/Title26/Chapter8A/C26-8a-P2a\\_1800010118000101.pdf](https://le.utah.gov/xcode/Title26/Chapter8A/C26-8a-P2a_1800010118000101.pdf)

§26-8a-250 establishes the statewide trauma system.

§26-8a-251 establishes the Trauma System Advisory Committee (TSAC). The TSAC is required to advise the state Department of Health regarding trauma system needs, assist the department in evaluating quality, make recommendations to the department, and review and comment on Department proposals and rules.

§ 26-8a-252 establishes the Department of Health's duties in regard to creating, overseeing, and administering the statewide trauma system

§26-8a-253 establishes the statewide trauma registry and quality assurance program.

**Does the state have any regulations or administrative rules addressing trauma funding? If so what is the agency of jurisdiction?** Yes.

Utah Admin. Code Sections R426-9-100 through R426-9-1300  
<https://rules.utah.gov/publicat/code/r426/r426-009.htm>

R426-9-100. Authority and Purpose for Trauma System Standards.

R426-9-200. Trauma System Advisory Committee.

R426-9-300. Trauma Center Categorization Guidelines.

R426-9-400. Trauma Center Review Process.

R426-9-500. Trauma Center Categorization Process.

R426-9-600. Trauma Center Designation Process.

R426-9-700. Data Requirements for an Inclusive Trauma System.

R426-9-800. Trauma Triage and Transfer Guidelines.

R426-9-900. Noncompliance to Trauma Standards.

R426-9-1000. Resource Hospital Minimum Designation Requirements.

R426-9-1100. Stroke Treatment and Stroke Receiving Facility Minimum Designation Requirements.

R426-9-1200. Percutaneous Coronary Intervention Center Minimum Designation Requirements.

R426-9-1300. Patient Receiving Facility Minimum Designation Requirements.

**How much money is appropriated for trauma funding? What sources of revenue are used to fund the trauma system?**

Pending from staff

**Are there any pending bills or proposed administrative rules?**

| Question                                                                      | Answer | Citation | Summary |
|-------------------------------------------------------------------------------|--------|----------|---------|
| Vermont<br><b>Does the state have any statutes addressing trauma funding?</b> |        |          |         |

**Does the state have any regulations or administrative rules addressing trauma funding? If so what is the agency of jurisdiction?**

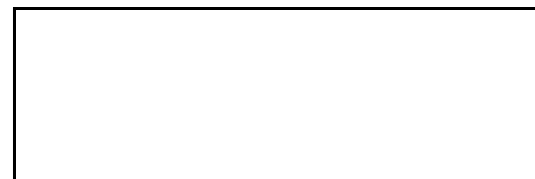

**How much money is appropriated for trauma funding? What sources of revenue are used to fund the trauma system?**

**Are there any pending bills or proposed administrative rules?**

| Question | Answer | Citation | Summary |
|----------|--------|----------|---------|
| Virginia |        |          |         |

**Does the state have any statutes addressing trauma funding?** Yes

<http://www.vdh.virginia.gov/emergency-medical-services/trauma-critical-care/trauma-center-fund/> 2004 General Assembly Session House Bill (HB) 1143 amended the *Code of Virginia* by adding section 18.2-270.01 which established the Trauma Center Fund for the Commonwealth of Virginia

**Does the state have any regulations or administrative rules addressing trauma funding? If so what is the agency of jurisdiction?**

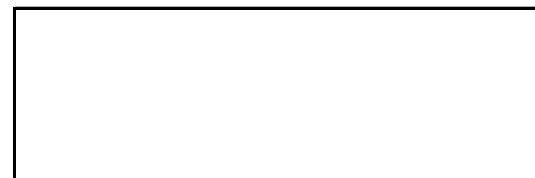

**How much money is appropriated for trauma funding? What sources of revenue are used to fund the trauma system?**

<http://www.vdh.virginia.gov/content/uploads/sites/23/2016/06/TraumaCenterFundDistributions11-13.pdf> Virginia- created a \$50 fine that must be paid by persons with repeat convictions for drug and alcohol offenses, generating about \$200,000 per year. Another \$40 fee is charged to reissue a license or registration to people with a suspended driver's license, garnering around \$4.3 million each year. Level I, II, and III trauma centers in good standing are eligible for these funds.

**Are there any pending bills or proposed administrative rules?**

**Question**  
Washington

**Answer**

**Citation**

**Summary**

|                                                                                                                                         |                                                                                                                                                                                                                                                                                       |                                                                                                                  |                                                                                                                                                                                  |
|-----------------------------------------------------------------------------------------------------------------------------------------|---------------------------------------------------------------------------------------------------------------------------------------------------------------------------------------------------------------------------------------------------------------------------------------|------------------------------------------------------------------------------------------------------------------|----------------------------------------------------------------------------------------------------------------------------------------------------------------------------------|
| <b>Does the state have any statutes addressing trauma funding?</b>                                                                      | <p>Yes.<br/> Wash. Rev. Code § 70.168.040 et. seq. This section establishes the Emergency medical services and trauma care system trust account.<br/> <a href="http://app.leg.wa.gov/rcw/default.aspx?cite=70.168.040">http://app.leg.wa.gov/rcw/default.aspx?cite=70.168.040</a></p> | <p>Wash. Rev. Code § 70.168.040 et. Seq.<br/> Wash. Rev. Code §70.168.060.<br/> Wash. Rev. Code §70.168.090.</p> | <p>The law requires the state to allocate funds to the Health Care Authority to fund the state's trauma system. Disbursements made are subject to legislative appropriation.</p> |
|                                                                                                                                         | <p>Wash. Rev. Code §70.168.060.<br/> Confers regulatory authority to the Washington Department of Health.<br/> <a href="https://app.leg.wa.gov/rcw/default.aspx?cite=70.168.060">https://app.leg.wa.gov/rcw/default.aspx?cite=70.168.060</a></p>                                      |                                                                                                                  |                                                                                                                                                                                  |
|                                                                                                                                         | <p>Wash. Rev. Code §70.168.090<br/> Creates the state trauma registry<br/> <a href="http://app.leg.wa.gov/RCW/default.aspx?cite=70.168.090">http://app.leg.wa.gov/RCW/default.aspx?cite=70.168.090</a></p>                                                                            |                                                                                                                  |                                                                                                                                                                                  |
| <b>Does the state have any regulations or administrative rules addressing trauma funding? If so what is the agency of jurisdiction?</b> | Yes                                                                                                                                                                                                                                                                                   | WAC 246-976-290 through WAC 246-976-900                                                                          | These are the Washington Healthcare Authority's rules and regulations addressing general procedures, operations, and policies, for state run trauma systems and EMS services.    |

**How much money is appropriated for trauma funding? What sources of revenue are used to fund the trauma system?**

SSB 5883 allocates from the Emergency Medical Services and Trauma Care Systems Trust Account state appropriation for Medical Assistance of \$15,086,000

Emergency Medical Services and Trauma Care Systems Trust Account, state appropriation to the Department of Health \$9,226,000

State Appropriation to the Department of Social and Health Services for Traumatic Brain Injury \$4,540,000

**SSB 5883** - omnibus spending bill  
**Status:** effective 6/30/2017  
<http://lawfilesexternal.wa.gov/bill/2017-18/Pdf/Bills/Senate/20Passed/20Legislature/5883-S.PL.pdf>

Funds used to finance the trauma system are collected from (1) traffic tickets, and (2) fees collected from motor vehicle dealerships

**Are there any pending bills or administrative rules?**

Yes. WSR 17-06-044 (CR101 - preproposal statement of inquiry)

Informal comments are being accepted until further notice. No public hearing is scheduled at this time (8/17/2017). The Agency will review informal comments and decide whether to proceed with formal rulemaking (CR102 and CR103) at a later date.

WSR 17-06-044  
<http://app.leg.wa.gov/documents/laws/wsr/2017/06/17-06-044.htm>

This regulations amends WAC 246-976-580 and 246-976-700 which have not been updated since 2009. The department is considering updating rules to more closely align with the current ACS designation standards to ensure trauma service evaluative criteria in Washington meet current and nationally recognized standards. The updated rules could assist trauma designated hospitals and centers in providing more optimal care to injured persons

**Question**

West Virginia

**Does the state have any statutes addressing trauma funding?**

**Answer**

**Citation**

**Summary**



**Does the state have any regulations or administrative rules addressing trauma funding? If so what is the agency of jurisdiction?**

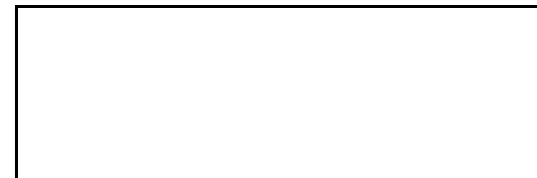

**How much money is appropriated for trauma funding? What sources of revenue are used to fund the trauma system?**

**Are there any pending bills or proposed administrative rules?**

#### Question

#### Answer

#### Citation

#### Summary

Wisconsin

**Does the state have any statutes addressing trauma funding?** Yes.

WI Stat § 256.25 (2014)  
<https://docs.legis.wisconsin.gov/statutes/statutes/256/25>

WI Stat § 256.25 Requires the Wisconsin Department of Health Services to develop and implement a statewide trauma care system. The Department is required to seek the advice of the Statewide Trauma Advisory Council to develop and implement the system, and also to establish Regional Trauma Advisory Councils.

WI Stat § 15.197 (25)  
<https://docs.legis.wisconsin.gov/statutes/statutes/15/II/197/25>

WI Stat § 15.197 (25) establishes the Statewide Trauma Advisory Council. The Council is appointed by the Secretary of the Department of Health and

**Does the state have any regulations or administrative rules addressing trauma funding? If so what is the agency of jurisdiction?**

Yes.

WI Stat § 256.25 (2014) confers regulatory jurisdiction and management authority over the state trauma system to the Wisconsin Department of Health Services.

Chapter DHS 118  
[https://docs.legis.wisconsin.gov/code/admin\\_code/dhs/110/118.pdf](https://docs.legis.wisconsin.gov/code/admin_code/dhs/110/118.pdf)

Chapter DHS 118 establishes the administrative rules that govern the state's trauma care system. The rules include sections addressing the following: scope of authority, organization of the trauma care system, the statewide trauma advisory council, regional trauma advisory councils, EMS services, hospitals, the state trauma registry, and performance improvement.

**How much money is appropriated for trauma funding? What sources of revenue are used to fund the trauma system?**

There is no specific appropriation for trauma services. Instead, the state funds the Department of Health which oversees the trauma system. More information is pending from staff regarding federal and state monies actually spent administering trauma and/or EMS.

**SB 30 (2017)**  
<http://docs.legis.wisconsin.gov/2017/related/proposals/sb30.pdf>

**AB 64 (2017)**  
<http://docs.legis.wisconsin.gov/2017/related/proposals/ab64.pdf>

**Status:** on Sept. 6, “the Joint Finance Committee (JFC) completed its work on the 2017-19 state budget. Statutory language of the budget bill will be finalized in the next few days, and the JFC-approved version will go first to the Assembly, then the Senate, for votes on the floor with likely no amendments of any substance.”

SB 30 and AB 64 are appropriations bills constituting the executive budget act of the 2017 legislature. The budget does not contain any line item or general appropriation for funding for the state trauma system. Instead, the state Department of Health Services oversees the trauma system.

**Are there any pending bills or proposed administrative rules?** Yes.

Citation not available at this time. The Department is drafting a proposed rule which will update DHS 118 bringing the state's trauma standards up to date. The amendments will adopt the 2015 ACS standards for trauma center accreditation. The current rules follow the 1999 trauma standards. The draft rule is still under review by the Department. Once approved, notice of the proposed rule will be published in the Wisconsin State Register at which time interested parties will have the opportunity to submit comments and attend any public hearings.

<https://www.dhs.wisconsin.gov/newsletters/dph/dph-trauma-july17.pdf>

**Question**

**Answer**

**Citation**

**Summary**

Wyoming

**Does the state have any statutes addressing trauma funding?** Yes

<https://health.wyo.gov/publichealth/ems/index-5/>

**Does the state have any regulations or administrative rules addressing trauma funding? If so what is the agency of jurisdiction?**

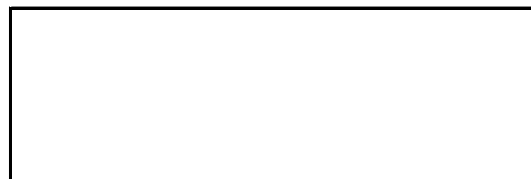

**How much money is appropriated for trauma funding? What sources of revenue are used to fund the trauma system?**

55000 per year

**Are there any pending bills or proposed administrative rules?**
